# Supplementary material for: The trans cell cycle effects of PARP inhibitors underlie their selectivity toward BRCA1/2-deficient cells
Source: PubMed Central journal article supplement — Genes Dev. 2021 Sep 1;35(17-18):1271–89. doi: 10.1101/gad.348479.121 (PMC8415318; doi:10.1101/gad.348479.121), 2021-09-01
Supplement: supp_gad.348479.121_Supplemental_Table1.pdf [file supp_gad.348479.121_Supplemental_Table1.pdf]

**Supplemental Table 1. Inhibitors and chemicals**

| Reagent                          | Source                   | Catalog #       |
|----------------------------------|--------------------------|-----------------|
| AFDye 647 Picolyl Azide          | Click Chemistry<br>Tools | Cat#1300        |
| Biotin Azide                     | Click Chemistry<br>Tools | Cat#1265        |
| Mirin                            | SelleckChem              | Cat#S8096       |
| Nocodazole                       | Fisher Scientific        | Cat#AC358240100 |
| Olaparib                         | SelleckChem              | Cat#S1060       |
| Palbociclib                      | ChemieTek                | Cat#CT-PD2991   |
| ProLong Gold Antifade Mountant   | Invitrogen               | Cat#P36930      |
| RI-1                             | SelleckChem              | Cat#S8077       |
| RO-3306                          | SelleckChem              | Cat#S7747       |
| SYBR Gold Nucleic Acid Gel Stain | Invitrogen               | Cat#S11494      |
| S1 nuclease                      | Invitrogen               | Cat#18001016    |
| Talazoparib                      | SelleckChem              | Cat#S7048       |
| AFDye 488 Tetrazine              | Click Chemistry<br>Tools | Cat#1361        |
| VdU                              | Jena Bioscience          | Cat#CLK-050-10  |
| Veliparib                        | SelleckChem              | Cat#S1004       |
| VE-821                           | SelleckChem              | Cat#S8007       |
| XL-413                           | SelleckChem              | Cat#S7547       |
