# Supplementary material for: The trans cell cycle effects of PARP inhibitors underlie their selectivity toward BRCA1/2-deficient cells
Source: PubMed Central journal article supplement — Genes Dev. 2021 Sep 1;35(17-18):1271–89. doi: 10.1101/gad.348479.121 (PMC8415318; doi:10.1101/gad.348479.121), 2021-09-01
Supplement: supp_gad.348479.121_Supplemental_Table2.pdf [file supp_gad.348479.121_Supplemental_Table2.pdf]

**Supplemental Table 2. siRNA sequences**

| Target    | Sequence              |
|-----------|-----------------------|
| BRCA1     | CAGCUACCCUCCAUCAUATT  |
| BRCA2     | GGAUUAUACAUAUUUCGCATT |
| CtIP      | GCUAAAACAGGAACGAAUCTT |
| PrimPol-1 | GAAGAGCCCAUAAGAGUAATT |
| PrimPol-2 | GAGACUAUUUCAUCGACAATT |
| RAD51     | GAGCUUGACAAACUACUUCUU |
| RECQ1-1   | GCAGUUCCCUAACGCAUCATT |
| RECQ1-2   | CUACGGCUUUGGAGAUUATT  |
